# Supplementary material for: Succession of the microbiota in the gut of reproductives of Macrotermes subhyalinus (Termitidae) at colony foundation gives insights into symbionts transmission
Source: Frontiers journal article supplement (doi:10.3389/fevo.2022.1055382), 2023-01-09
Supplement: Table_2.docx [file Table_2.docx]

**Table S2**. *Alpha*-diversity indices (Hill numbers) for the mycobiome and bacteriome from metabarcoding libraries from the gut of *M. subhyalinus* reproductives over colony foundation, in comparison with the copularium samples at day 120. Day 0 to Day 120 refer to gut samples at the corresponding sampling time points. The displayed values refer to arithmetic averages followed by the standard deviation (in brackets). The letters refer to statistical classes distinguished according to the One-way ANOVA with the Fisher’s LSD Post Hoc Test, at p<0.05. † There was two repetitions for gut samples at day 120, they were not included in the statistical analysis and values in brackets for this date are deviations from the mean values.

| **FUNGI** | **q = 0** | **q = 1** | **q = 2** |
| --- | --- | --- | --- |
| Day 0 (N=6) | 151 (30) A | 25.75 (11.55) AB | 9.93 (4.52) AB |
| Day 10 (N=5) | 150 (46) A | 21.98 (3.92) A | 10.08 (4.30) AB |
| Day 30 (N=5) | 134 (59) A | 13.91 (10.81) A | 5.51 (4.77) A |
| Day 45 (N=6) | 218 (51) B | 30.29 (7.67) B | 9.54 (4.23) AB |
| Day 60 (N=5) | 188 (33) B | 28.13 (8.32) B | 8.06 (3.30) AB |
| Copularium 120 (N=3) | 289 (27) C | 55.73 (17.47) C | 13.07 (2.23) B |
| **BACTERIA** |  |  |  |
| Day 0 (N=6) | 609 (57) A | 181.36 (41.39) B | 47.47 (18.26) B |
| Day 10 (N=5) | 609 (22) A | 172.59 (27.72) B | 53.08 (15.84) B |
| Day 30 (N=5) | 591 (34) A | 117.45 (29.26) A | 26.73 (11.18) A |
| Day 45 (N=6) | 601 (57) A | 113.35 (40.09) A | 23.19 (11.31) A |
| Day 60 (N=6) | 634 (38) A | 179.96 (31.11) B | 51.80 (14.43) B |
| Day 120 (N=2) | 334 (9)† | 82.52 (6.83) † | 28.97 (1.15) † |
| Copularium 120 (N=3) | 1182 (47.63) B | 734.51 (60.34) C | 270.20 (28.11) C |
